# Supplementary material for: Aging and Hypercholesterolemia Differentially Affect the Unfolded Protein Response in the Vasculature of ApoE −/− Mice
Source: PubMed Central journal article supplement — J Am Heart Assoc. 2021 Sep 17;10(18):e020441. doi: 10.1161/JAHA.120.020441 (PMC8649520; doi:10.1161/jaha.120.020441), 2021-09-17
Supplement: JAH3-10-e020441-s001.pdf [file JAH3-10-e020441-s001.pdf]

# **SUPPLEMENTAL MATERIAL**

## Data S1.

### Supplemental Materials and Methods

**principal component analysis (PCA):** PCA was used to establish similarity or dissimilarity between the expression profile of UPR-related genes in aortae from *ApoE*<sup>-/-</sup> and C57BL6 mice aged at 14 and 30 weeks. The transcriptome dataset for PCA analysis was obtained from Gene Expression Omnibus database: GSE163657, which compared aortic gene expression profiles of *ApoE*<sup>-/-</sup> and C57BL6 mice at different ages; they are all on a normal chow diet. Data analysis was carried out using the PCA tools package in R (v3.1.2). The obtained five-component model explained 94.58% of the total variance. The five principle components account for 44.31%, 17.19%, 16.13%, 12.83%, and 4.12% of total variability, respectively.

**TableS1. Effect size of compared groups.**

| <b>Variable Name</b>                 | <b>Groups of comparison</b> | <b>Mean1</b> | <b>Mean2</b> | <b>SD1</b> | <b>SD2</b> | <b>N1</b> | <b>N2</b> | <b>p-value</b> | <b>effect size (cohen's d)</b> |
|--------------------------------------|-----------------------------|--------------|--------------|------------|------------|-----------|-----------|----------------|--------------------------------|
| plasma triglyceride                  | control vs WD               | 71.38        | 127.4        | 13.36      | 32.68      | 7         | 7         | 0.0175         | 2.243968927                    |
|                                      | control vs aged             | 71.38        | 94.68        | 13.36      | 47.52      | 7         | 7         | 0.9655         | 0.667536833                    |
| plasma cholesterol                   | control vs WD               | 451.6        | 1307         | 97.51      | 116        | 8         | 8         | 0.004          | 7.98286128                     |
|                                      | control vs aged             | 451.6        | 537.2        | 97.51      | 161.3      | 8         | 8         | >0.999         | 0.642267991                    |
| Cleaved ATF6a in aorta               | control vs WD               | 1.016        | 10.39        | 0.1708     | 3.94       | 7         | 6         | 0.0012         | 3.524933529                    |
|                                      | control vs aged             | 1.016        | 44.31        | 0.1708     | 15.39      | 7         | 6         | 0.0012         | 4.172230956                    |
|                                      | WD vs aged                  | 10.39        | 44.31        | 3.94       | 15.39      | 6         | 6         | 0.0022         | 3.019583706                    |
| p-IRE1a protein levels in aorta      | control vs WD               | 1.11714      | 2.13167      | 0.17337    | 0.31884    | 7         | 6         | <0.0001        | 4.054775543                    |
| IRE1a protein levels in aorta        | control vs WD               | 1.00857      | 3.37667      | 0.2166     | 0.54106    | 7         | 6         | <0.0001        | 5.945255658                    |
| xBP1s protein levels in aorta        | control vs WD               | 0.99143      | 2.345        | 0.13018    | 0.34807    | 7         | 6         | <0.0001        | 5.337452593                    |
| xBP1s/total xBP1 mRNA ratio in aorta | WD vs aged                  | 1.204        | 0.535        | 0.5093     | 0.1972     | 9         | 12        | 0.0003         | 1.843252362                    |
| p-PERK protein levels in aorta       | control vs WD               | 0.69429      | 1.15667      | 0.09217    | 0.14052    | 7         | 6         | 0.004          | 3.963496421                    |
| p-eIF2a protein levels in aorta      | control vs WD               | 0.80714      | 1.74833      | 0.16408    | 0.19854    | 6         | 7         | <0.0001        | 5.124095839                    |
| ATF4 mRNA levels in aorta            | control vs WD               | 0.9193       | 4.144        | 0.2781     | 3.001      | 8         | 9         | 0.0014         | 1.465879893                    |
|                                      | control vs aged             | 0.9193       | 2.583        | 0.2781     | 1.458      | 8         | 12        | 0.0475         | 1.443069611                    |
| BiP protein levels in aorta          | control vs aged             | 1.15171      | 0.485        | 0.30613    | 0.31984    | 7         | 6         | 0.0087         | 2.133936023                    |
| PDI protein levels in aorta          | control vs aged             | 1.13571      | 0.52833      | 0.15608    | 0.15446    | 7         | 6         | 0.0177         | 3.909869396                    |
| BiP mRNA levels in aorta             | control vs WD               | 0.9813       | 4.144        | 0.2693     | 3.001      | 8         | 9         | 0.00561        | 1.438030056                    |
|                                      | control vs aged             | 0.9813       | 6.734        | 0.2693     | 3.962      | 8         | 8         | 0.0002         | 2.048666845                    |
| PDI mRNA levels in aorta             | control vs WD               | 1.03         | 1.303        | 0.2762     | 0.328      | 3         | 4         | >0.999         | 0.885426214                    |
|                                      | control vs aged             | 1.03         | 4.722        | 0.2762     | 2.33       | 3         | 6         | 0.0129         | 1.869617105                    |
| BIP fluor. intensity in aorta        | WD vs aged                  | 1157         | 769.3        | 62.51      | 124.5      | 4         | 5         | 0.0159         | 3.777825099                    |
| CHOP protein levels in aorta         | control vs WD               | 1.01         | 7.43         | 0.19459    | 1.76686    | 7         | 6         | 0.007          | 5.350641845                    |
|                                      | control vs aged             | 1.01         | 22.77        | 0.19459    | 7.33366    | 7         | 6         | <0.0001        | 4.399119777                    |
|                                      | WD vs aged                  | 7.43         | 22.77        | 1.76686    | 7.33366    | 6         | 6         | <0.0001        | 2.875856956                    |
| p-JNK protein levels in aorta        | control vs WD               | 0.90143      | 7.21833      | 0.27883    | 1.97866    | 7         | 6         | 0.0009         | 4.679834322                    |
|                                      | control vs aged             | 0.90143      | 11.5733      | 0.27883    | 4.44582    | 7         | 6         | <0.0001        | 3.552045238                    |
|                                      | WD vs aged                  | 7.21833      | 11.5733      | 1.97866    | 4.44582    | 6         | 6         | 0.0335         | 1.265634319                    |
| cleaved caspase 3 levels in aorta    | control vs WD               | 1.03571      | 2.14167      | 0.4432     | 0.53237    | 7         | 6         | 0.0082         | 2.276718342                    |
|                                      | control vs aged             | 1.03571      | 3.2          | 0.4432     | 0.56391    | 7         | 6         | 0.0012         | 4.314029088                    |
|                                      | WD vs aged                  | 2.14167      | 3.2          | 0.53237    | 0.56391    | 6         | 6         | 0.017          | 1.929966378                    |

| <b>Variable Name</b>                        | <b>Groups of comparison</b> | <b>Mean1</b> | <b>Mean2</b> | <b>SD1</b> | <b>SD2</b> | <b>N1</b> | <b>N2</b> | <b>p-value</b> | <b>effect size (cohen's d)</b> |
|---------------------------------------------|-----------------------------|--------------|--------------|------------|------------|-----------|-----------|----------------|--------------------------------|
| CHOP mRNA levels in aorta                   | control vs WD               | 0.8867       | 2.684        | 0.2951     | 1.694      | 8         | 9         | 0.0386         | 1.433893968                    |
|                                             | control vs aged             | 0.8867       | 5.365        | 0.2951     | 4.852      | 8         | 12        | 0.0176         | 1.179293059                    |
|                                             | WD vs aged                  | 2.684        | 5.365        | 1.694      | 4.852      | 9         | 12        | >0.999         | 0.696004723                    |
| CHOP fluor. intensity in aorta              | control vs WD               | 422.1        | 686.3        | 41.14      | 153.9      | 5         | 5         | 0.1887         | 2.345425267                    |
|                                             | control vs aged             | 422.1        | 987.7        | 41.14      | 189.3      | 5         | 6         | 0.0016         | 3.934969612                    |
|                                             | WD vs aged                  | 686.3        | 987.7        | 153.9      | 189.3      | 5         | 6         | 0.381          | 1.727658696                    |
| Cleaved caspase 3 fluor. Intensity in aorta | control vs WD               | 719.9        | 1055         | 79.19      | 141.7      | 5         | 5         | 0.0585         | 2.91944004                     |
|                                             | control vs aged             | 719.9        | 1115         | 79.19      | 182.4      | 5         | 5         | 0.012          | 2.809954018                    |
|                                             | WD vs aged                  | 1055         | 1115         | 141.7      | 182.4      | 5         | 5         | >0.999         | 0.367370713                    |
| cleaved ATF6a in lung tissues               | control vs WD               | 1.446        | 12.67        | 0.726      | 2.584      | 7         | 6         | 0.001          | 6.157632433                    |
|                                             | control vs aged             | 1.446        | 2.317        | 0.726      | 1.191      | 7         | 6         | 0.6457         | 0.90208946                     |
| p-IRE-1a protein levels in lung tissues     | control vs WD               | 1.226        | 2.48         | 0.256      | 0.312      | 7         | 6         | <0.0001        | 4.433720747                    |
|                                             | control vs aged             | 1.226        | 2.427        | 0.256      | 0.416      | 7         | 6         | <0.0001        | 3.550695504                    |
| XBP1s protein levels in lung tissues        | control vs WD               | 1.257        | 2.318        | 0.228      | 0.251      | 7         | 6         | <0.0001        | 4.444362496                    |
|                                             | control vs aged             | 1.257        | 0.675        | 0.228      | 0.172      | 7         | 6         | 0.0015         | 2.84658076                     |
| p-eIF2a protein levels in lung tissues      | control vs WD               | 1.33         | 2.01         | 0.2812     | 0.2691     | 7         | 6         | 0.091          | 2.465860304                    |
|                                             | control vs aged             | 1.33         | 0.815        | 0.2812     | 0.1825     | 7         | 6         | 0.181          | 2.133457912                    |
|                                             | WD vs aged                  | 2.01         | 0.815        | 0.2691     | 0.1825     | 6         | 6         | 0.0003         | 5.197591562                    |
| BiP protein levels in lung tissues          | control vs WD               | 1.1          | 1.32167      | 0.26357    | 0.20527    | 7         | 6         | 0.078          | 0.928101844                    |
|                                             | control vs aged             | 1.1          | 0.83         | 0.26357    | 0.18144    | 7         | 6         | 0.0262         | 1.174417714                    |
|                                             | WD vs aged                  | 1.32167      | 0.83         | 0.20527    | 0.18144    | 6         | 6         | 0.001          | 2.537997131                    |
| PDI protein levels in lung tissues          | control vs WD               | 0.92429      | 0.57         | 0.12205    | 0.14353    | 7         | 6         | 0.003          | 2.679043086                    |
|                                             | control vs aged             | 0.92429      | 0.64         | 0.12205    | 0.06164    | 7         | 6         | 0.774          | 2.864138267                    |
|                                             | WD vs aged                  | 0.57         | 0.64         | 0.14353    | 0.06164    | 6         | 6         | 0.0185         | 0.633750222                    |
| CHOP protein levels in lung tissues         | control vs WD               | 0.86         | 1.14833      | 0.15481    | 0.19426    | 7         | 6         | 0.7314         | 1.658464789                    |
|                                             | control vs aged             | 0.86         | 1.365        | 0.15481    | 0.23628    | 7         | 6         | 0.8482         | 2.575391192                    |
|                                             | WD vs aged                  | 1.14833      | 1.365        | 0.19426    | 0.23628    | 6         | 6         | 0.3888         | 1.001720406                    |
| P-JNK protein levels in lung tissues        | control vs WD               | 1.31         | 7.54833      | 0.6758     | 1.40585    | 7         | 6         | <0.0001        | 5.823659265                    |
|                                             | control vs aged             | 1.31         | 7.08         | 0.6758     | 1.27433    | 7         | 6         | <0.0001        | 5.807125906                    |
|                                             | WD vs aged                  | 7.54833      | 7.08         | 1.40585    | 1.27433    | 6         | 6         | 0.467          | 0.349058735                    |
| cleaved caspase 3 levels in lung tissues    | control vs WD               | 1.00286      | 1.28667      | 0.36358    | 0.24402    | 7         | 6         | 0.7385         | 0.901229867                    |
|                                             | control vs aged             | 1.00286      | 1.225        | 0.36358    | 0.145      | 7         | 6         | 0.8301         | 0.777366402                    |
|                                             | WD vs aged                  | 1.28667      | 1.225        | 0.24402    | 0.145      | 6         | 6         | 0.9867         | 0.307237553                    |

**Figure S1. PCA analysis of transcriptome datasets for aortae obtained from *ApoE*<sup>-/-</sup> and C57BL6 mice indicated the aortic expression profile of UPR-related genes was similar between these two groups at 14 weeks of age but showed significant differences at 30 weeks of age.**

**A**

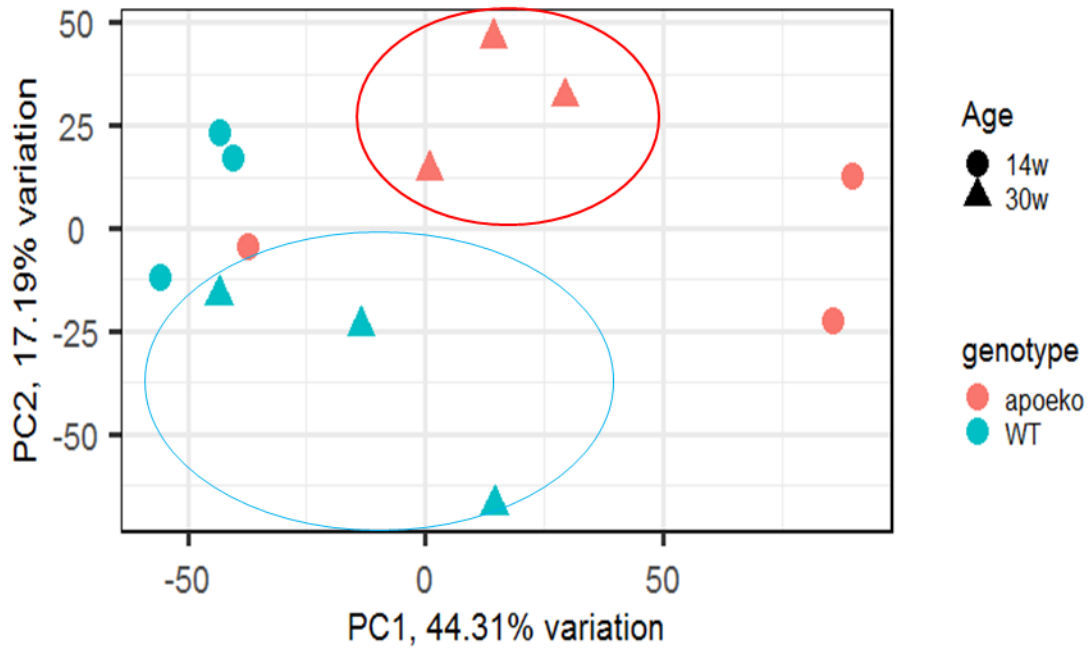

**B**

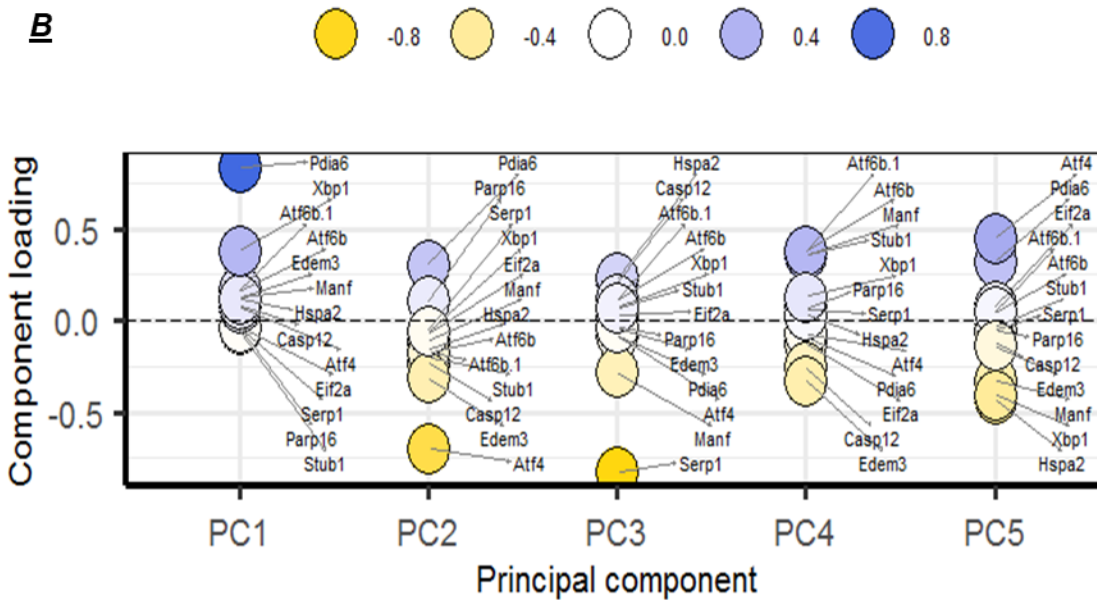

**A.** Score plot of the principle component 1 and 2, which account for more than 60% of total variability.

At 30 weeks of age (closed triangles), UPR-related gene expression profile showed the greatest separation between *ApoE*<sup>-/-</sup> and C57BL6 mice (blue circle for C57BL6 mice, orange circle for *ApoE*<sup>-/-</sup> mice), while at 14 weeks of age (closed circle), no clear separation was observed. **B.** component loading plot of UPR-related gene expression in *ApoE*<sup>-/-</sup> and C57BL6 mice. The UPR-related genes influencing each of the five principle components (PC1- PC5) were illustrated.
